# Supplementary material for: The Hy-MASS concept: hydrothermal microwave assisted selective scissoring of cellulose for in situ production of (meso)porous nanocellulose fibrils and crystals
Source: Royal Society of Chemistry journal article supplement (doi:10.1039/c7gc01378g), 2017-01-01
Supplement: c7gc01378g1.pdf [file c7gc01378g1.pdf]

## Electronic Supplementary Information (ESI)

### **The Hy-MASS Concept: Hydrothermal Microwave Assisted Selective Scissoring of cellulose for in-situ production of (meso)porous nanocellulose fibrils and crystals <sup>†</sup>**

Eduardo M. de Melo <sup>a</sup>, James H. Clark <sup>a</sup>, Avtar S. Matharu <sup>a\*</sup>

<sup>a</sup> *Green Chemistry Centre of Excellence, Department of Chemistry, University of York, UK. \*E-mail: [avtar.matharu@york.ac.uk](mailto:avtar.matharu@york.ac.uk)*

<sup>†</sup> Electronic Supplementary Information (ESI) available: Experimental data, ATR-IR, Py-GC-MS, HPLC sugar analysis, CHN and ICP-OES. See DOI: 10.1039/b000000x/

## **S1: INSTRUMENTAL EXPERIMENTAL DATA**

### **I. Transmission Electron Microscopy (TEM)**

TEM images of nanocellulose were acquired using a TEM Tecnai 12 BioTWIN (manufactured by FEI) coupled to a SIS Megaview 3 camera at acceleration voltage of 120 kV. Prior to the analysis, diluted samples (0.2% aqueous) were sonicated for 30 minutes using ice-cold ultrasound bath (output of 1200 W). Drops of the sample ((about 8  $\mu$ L) were left on the grid for five minutes then negatively stained with 1% uranyl acetate and finally glow discharged. Copper grids with a formvar/carbon support film were used.

### **II. Solid State<sup>13</sup>C CP-MAS Nuclear Magnetic Resonance**

Solid State<sup>13</sup>C CP-MAS NMR spectra were acquired using a 400 MHz Bruker Avance III HD spectrometer equipped with a Bruker 4mm H(F)/X/Y triple-resonance probe and 9.4T Ascend® superconducting magnet. The CP experiments employed a 1 ms linearly-ramped contact pulse, spinning rates of 12000  $\pm$  2 Hz, optimized recycle delays of 5 seconds, and numbers of scans varying from 200-300. Chemical shifts were reported with respect to TMS, and were referenced using adamantane (29.5 ppm) as an external secondary reference.

### **III. Thermogravimetric Analysis (TGA)**

TGA was carried out under a flow of nitrogen (100 mL min<sup>-1</sup>) using a NETZSCH Themishe Analyse STA 409 cell for nanocellulose, protopectin and hemicellulose analysis (25–700 °C at 10 °C min<sup>-1</sup>).

### **IV. X-ray Powder Diffraction (XRD)**

XRD analysis was performed on a Bruker-AXS D8 Advance Diffractometer equipped with a Cu source producing a monochromatic K- $\alpha$  radiation at wavelength of 1.54184 Å and a PSD Lynxeye detector. Samples were ground to a fine powder prior to analysis. Samples were run with a rate of 0.05°/sec over a 2 $\theta$  range of 5-38° (cellulose do not present any diffraction pattern after this angle) in a locked coupled theta-2 $\theta$  scan mode. Generator voltage and current were set to 40 kV and 40 mA respectively. Samples background was subtracted.

The crystalline index (CrI) was calculated as:

$$CrI = \frac{I_{200} - I_{am}}{I_{200}} * 100 \quad [\%]$$

Where:

$I_{200}$  = intensity of the (200) peak (at ca. 2 $\theta$  = 22°)

$I_{am}$  = intensity of amorphous contributions (at 2 $\theta$  = 18°)

### **V. Attenuated Total Reflection Fourier Transform Infrared Spectroscopy (ATR-IR)**

ATR-IR was carried out using a Perkin Elmer Spectrometer (Spectrum 400). Spectra were taken from 4000 cm<sup>-1</sup> to 600 cm<sup>-1</sup> at 4 scans, with a spectral resolution of 4 cm<sup>-1</sup> and a blank window for background.

## **VI. BET/BJH Porosimetry Analysis**

The surface area and porosity of the Nanocellulose samples was analysed using a Micromeritics TriStar Surface Area and Porosity Analyser. A measured amount of dry (ca. 50 mg), powdered sample was put inside a clean, dry porosimetry tube and their mass was recorded. Next, degassing of the samples were performed at a temperature of 90 °C for 4-5 h. After degassing, the mass of the glassware and sample was re-measured and this value used for the analysis. All analyses were done in triplicates. The data was processed (using TriStar software). Specific surface areas were calculated using the Brunauer-Emmett-Teller (BET) equation. Desorption pore volume and pore size were calculated using Barrett-Joyner-Halenda (BJH) equations.

## **VII. High-performance Liquid Chromatography (HPLC) Analysis of sugars**

Sugars (levoglucosan, glucose, fructose/xylose, cellobiose and rhamnose), sugar acids (glucuronic acid and galacturonic acid) and organic acids (lactic acid, formic acid and acetic acid) present in the aqueous filtrate were quantified by HPLC using the following conditions: Agilent Hi-Plex H (300 x 7.7mm, 8µm particle size) column, 0.005M H<sub>2</sub>SO<sub>4</sub> as mobile phase, isocratic mode, flow-rate at 0.4 mL/min., column temperature at 60 °C, Refractive Index Detector (55 °C), Injection Volume of 5 µl and total run time of 35 minutes.

## **VIII. Inductively Coupled Plasma Optical Emission Spectrometry (ICP-OES)**

A weighed sample was placed in a microwavable digestion tube, and reverse aqua-regia was added to it (9 mL of conc. HNO<sub>3</sub> and 3 mL of conc. HCl). The sample was then digested with the aid of a microwave digester (Mars Xpress). Once digestion was completed, the sample was diluted to 25 mL using deionised water and filtered. Samples were analysed on a axial Varian vista ICP-OES. Results were automatically corrected for dilution factor.

## **IX. Carbon, Hydrogen and Nitrogen Elemental Microanalysis (CHN)**

CHN data was recorded with a CE-440 elemental analyser from Exeter Analytical, in conjunction with a Sartorius S2 analytical balance. Samples were combusted at 975 °C in an oxygen atmosphere, and the combustion products analysed by a series of thermal conductivity detectors.

## **X. Pyrolysis Gas Chromatography-Mass Spectroscopy (Py-GC-MS)**

Py-GC-MS results were acquired using a CDS Analytical 5250-T Trapping Pyrolysis Autosampler (UK) was used as the pyrolysis unit, Agilent Technologies 7890B GC System (USA) as gas chromatography unit and Agilent Technologies 5977A MSD (USA) as mass spectrometer. The sample was loaded into the pyrolysis unit and pyrolyzed at 600 °C for 10 s. The volatile materials released were carried into the GC/MS unit by nitrogen for analysis. The following GC/MS parameters were applied: GC inlet temperature at 350 °C, initial temperature at 40 °C for 2 min, ramp rate at 10 K/min till 300 °C, holding at 300 °C for 30 min, split ratio with 50:1. Volatile compounds were identified by comparing the mass spectra with NIST Lab database. Analysis was performed in BDC, University of York.

## **XI. Water holding Capacity (WHC)**

Water holding capacity (WHC) of samples were estimated by the method described by Matzain, 2014 [23]. Weighted mass of the sample (ca. 0.20g) is mixed with 20 mL of water, stirred for 20 minutes and then centrifuged (3500 rpm, 20°C, 20 minutes). After pouring down the supernatant

from the centrifuge tube, the WHC (g of water/g dry sample) of the sample can be calculated by the following equation:

$$WHC = \frac{[(mass\ of\ tube + precipitate) - (mass\ of\ tube + sample\ mass)]}{mass\ of\ dry\ sample}$$

## **XII. Scanning Electron Microscopy (SEM)**

Dried samples were sputter coated with Gold/Palladium, around 4nm and analysed in a JEOL JSM-7600F SEM equipment.

## S2: HPLC SUGAR ANALYSIS

After microwave processing (MHT) of OPR-CAE and OPR-MAE, the products nanocellulose (CMC and MMC respectively) and aqueous filtrate (CAF and MAF respectively) were yielded. This HPLC analysis shows the concentration (mg/mL) of several sugars and sugar derivatives on the aqueous filtrates.

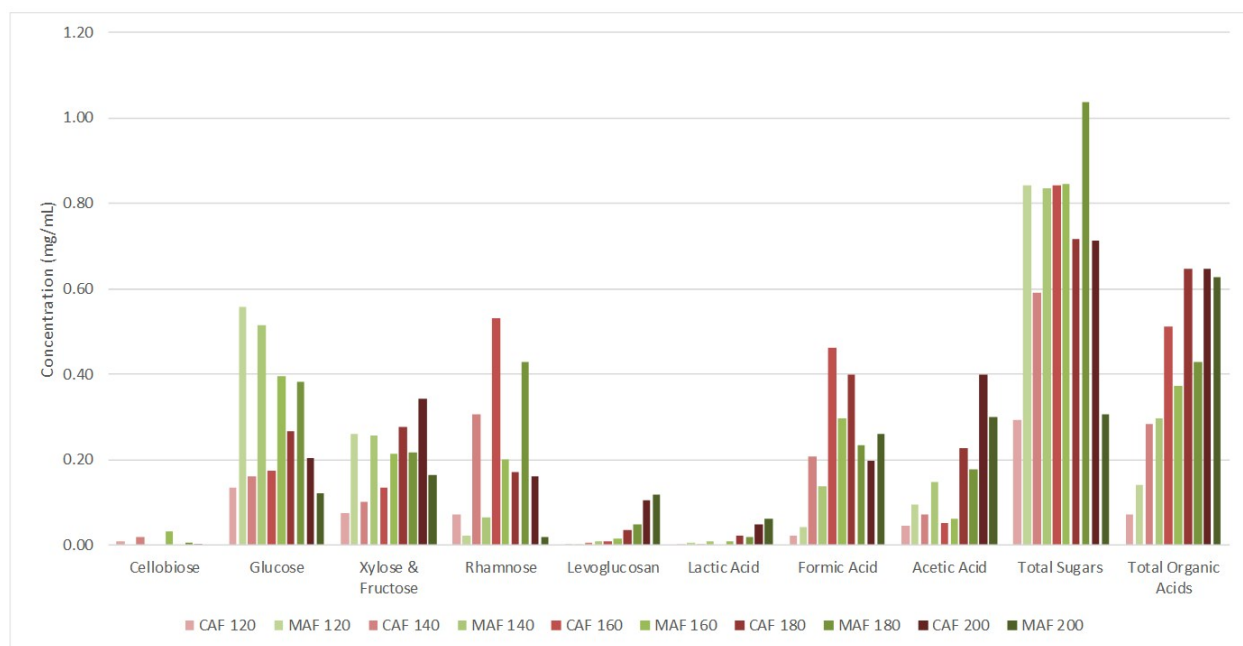

### S3: ICP-OES

Summary results from ICP-OES analysis of nanocelluloses and their precursors (OPR-CAE and OPR-MAE). Only the top 5 inorganic elements are shown.

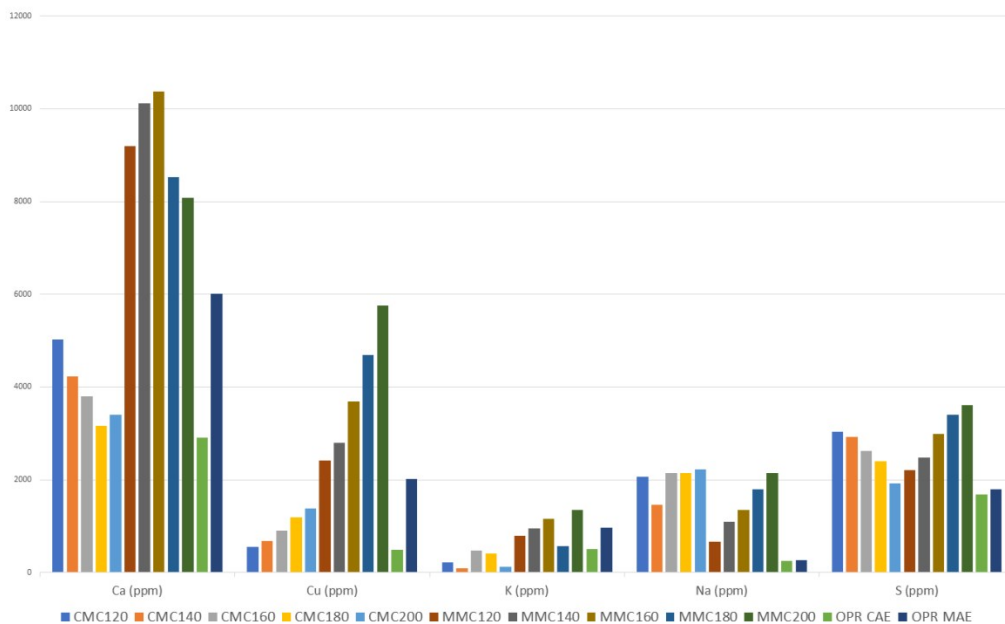

#### S4: CHN

This graph just shows the nitrogen (N) content of the samples.

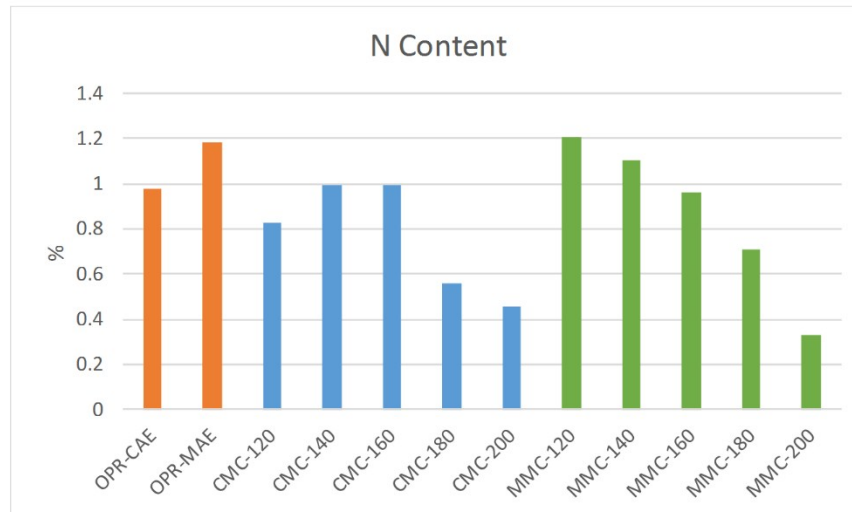

## S5: ATR-IR

- I. **Table: Overall assignment of ATR-IR spectra of MNC samples. C = cellulose, P = pectins and H = hemicelluloses,  $\text{CaC}_2\text{O}_4$  = calcium oxalate and lignin**

| Absorption Band ( $\text{cm}^{-1}$ ) | Group Assignment                                         | Compound(s)                       |
|--------------------------------------|----------------------------------------------------------|-----------------------------------|
| 3570-3200                            | $\nu(\text{O-H})$                                        | C, P, H                           |
| 2980-2850                            | $\nu(\text{C-H})$                                        | C, P, H                           |
| 1740-1710                            | $\nu(\text{C=O})$                                        | P, H, L                           |
| 1645-1630                            | $\delta(\text{H}_2\text{O})$                             | All                               |
| 1630-1610                            | $\nu(\text{COO}^-)$                                      | P, H, L, $\text{CaC}_2\text{O}_4$ |
| 1515-1520                            | $\nu(\text{C-C, C-H})_{\text{arom.}}$                    | L                                 |
| 1440-1420                            | $\delta(\text{CH}_2, \text{CH}_3)$ and $\nu(\text{C-O})$ | All                               |
| 1400-1300                            | $\nu, \delta(\text{C-H, C-O, C-C})$                      | All                               |
| 1230-1240                            | $\nu(\text{C-O-H, C-O})_{\text{arom.}}$                  | L                                 |
| 1200-1000                            | $\nu(\text{C-C, C-O-C, C-O})$                            | C, P, H                           |
| 990-896                              | $\nu(\text{C-O-C ring})$                                 | C, P, H                           |

- II. ATR-IR spectra of MMC (A) and CMC (B) samples. Arrows emphasise the removal of pectins/hemicellulose from nanocellulose fibrils with increasing microwave processing (MHT) temperature.

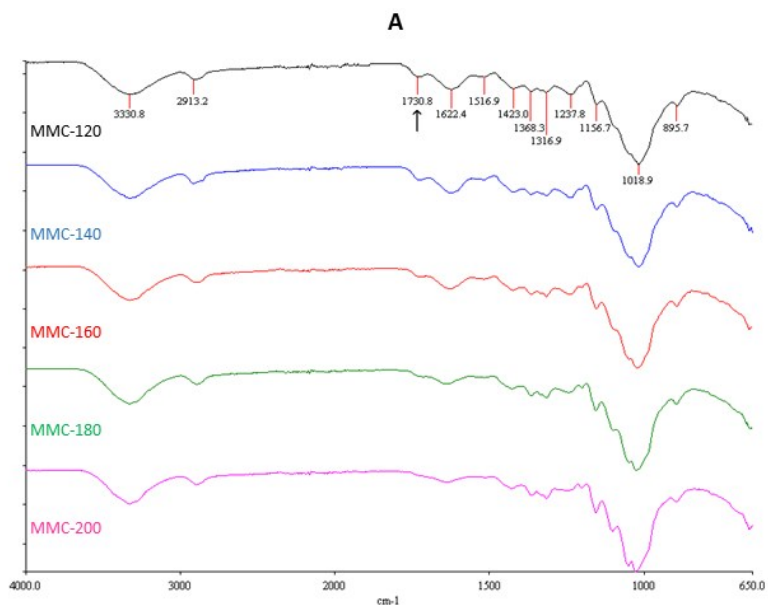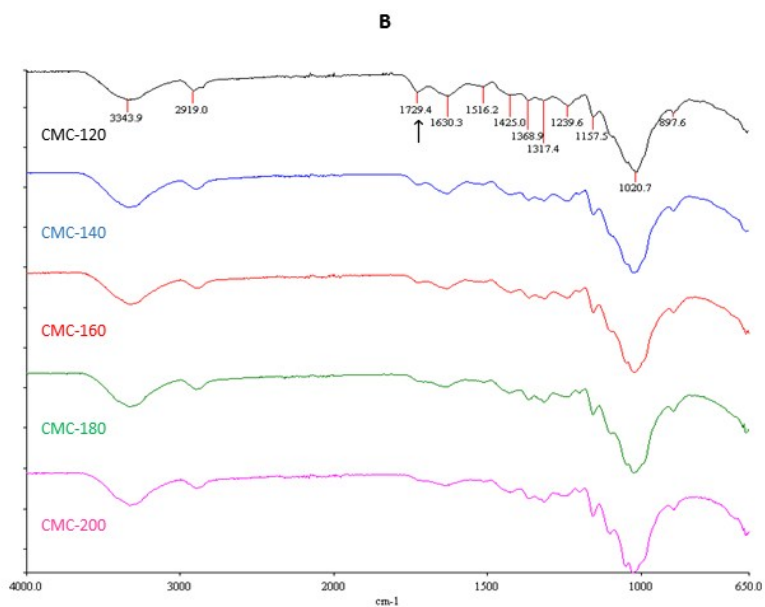

## S6: PY-GC-MS

This table shows the Py-GC-MS result of sample CMC-120. All samples presented similar products.

| Cpd | Name                                                                                  | Formula  | Score | Mass (DB) | RT    | Area     | Relative% |
|-----|---------------------------------------------------------------------------------------|----------|-------|-----------|-------|----------|-----------|
| 1   | 2-Propanamine, 1-methoxy-                                                             | C4H11NO  | 70.71 | 89.1      | 1.75  | 663939   | 0.19      |
| 2   | Methyl glyoxal                                                                        | C3H4O2   | 90.24 | 72        | 1.898 | 20365075 | 5.73      |
| 3   | 6-exo-Methyl-5-endo-norbornenol                                                       | C8H12O   | 68.92 | 124.1     | 2.047 | 539640   | 0.15      |
| 4   | 4-Acetoxy-2-azetidinone                                                               | C5H7NO3  | 76.3  | 129       | 2.173 | 6570818  | 1.85      |
| 5   | 2-Butanone, 3-methyl-                                                                 | C5H10O   | 79.85 | 86.1      | 2.253 | 5369585  | 1.51      |
| 6   | Propanoic acid, 2-oxo-                                                                | C3H4O3   | 71.33 | 88        | 2.344 | 5566149  | 1.57      |
| 7   | Acetic acid                                                                           | C2H4O2   | 94.83 | 60        | 2.55  | 15314676 | 4.31      |
| 8   | Methacrolein                                                                          | C4H6O    | 87.6  | 70        | 2.71  | 1826976  | 0.51      |
| 9   | 2-Propanone, 1-hydroxy-                                                               | C3H6O2   | 81.51 | 74        | 2.813 | 11386274 | 3.20      |
| 10  | 3-Buten-2-one, 3-methyl-                                                              | C5H8O    | 87.25 | 84.1      | 2.904 | 1091195  | 0.31      |
| 11  | Isoxazolidine, 4-ethyl-2,5-dimethyl-, cis-                                            | C7H15NO  | 75.08 | 129.1     | 2.984 | 1314246  | 0.37      |
| 12  | Hydroxylamine, O-(2-methylpropyl)-                                                    | C4H11NO  | 81.21 | 89.1      | 3.121 | 787905   | 0.22      |
| 13  | 5-Hexen-2-ol, 5-methyl-                                                               | C7H14O   | 73.83 | 114.1     | 3.281 | 2926536  | 0.82      |
| 14  | Propanoic acid, 2-oxo-, methyl ester                                                  | C4H6O3   | 77.59 | 102       | 3.567 | 480400   | 0.14      |
| 15  | 3-Buten-2-one, 3-methyl-                                                              | C5H8O    | 78.44 | 84.1      | 3.704 | 1011228  | 0.28      |
| 16  | 1-Cyclohexene-1-methanol                                                              | C7H12O   | 75.27 | 112.1     | 3.773 | 486257   | 0.14      |
| 17  | 2H-Pyran, 3,4-dihydro-                                                                | C5H8O    | 77.78 | 84.1      | 3.853 | 1261355  | 0.35      |
| 18  | 1-Hexyne                                                                              | C6H10    | 81.58 | 82.1      | 3.944 | 845226   | 0.24      |
| 19  | 1-Phenyl-2-propanone                                                                  | C9H10O   | 66.26 | 134.1     | 4.127 | 8524981  | 2.40      |
| 20  | 2-Hexene, (Z)-                                                                        | C6H12    | 77.08 | 84.1      | 4.207 | 631583   | 0.18      |
| 21  | Succinaldehyde                                                                        | C4H6O2   | 84.79 | 86        | 4.299 | 2575625  | 0.72      |
| 22  | Propanoic acid, 2-oxo-, methyl ester                                                  | C4H6O3   | 83.34 | 102       | 4.447 | 7221905  | 2.03      |
| 23  | 2H-Pyran, 3,4-dihydro-                                                                | C5H8O    | 78.23 | 84.1      | 4.562 | 2911089  | 0.82      |
| 24  | Furfural                                                                              | C5H4O2   | 79.47 | 96        | 4.813 | 1052802  | 0.30      |
| 25  | Furfural                                                                              | C5H4O2   | 89.41 | 96        | 5.156 | 11735314 | 3.30      |
| 26  | Cyclopropanecarboxylic acid, cyclohexylmethyl ester                                   | C11H18O2 | 79.21 | 182.1     | 5.259 | 1373519  | 0.39      |
| 27  | 2-Nonynoic acid                                                                       | C9H14O2  | 74.48 | 154.1     | 5.373 | 651726   | 0.18      |
| 28  | 2,3-Dihydrooxazole, 2-t-butyl-4-(1-hydroxy-1-methylethyl)-3-methoxycarbonyl-5-methyl- | C6H10O   | 80.92 | 98.1      | 5.556 | 3839272  | 1.08      |
| 29  | 4-Penten-2-one, 3-methyl-                                                             | C6H10O   | 72.38 | 98.1      | 5.762 | 3470771  | 0.98      |
| 30  | 9-Oxabicyclo[6.1.0]nonan-4-one                                                        | C8H12O2  | 77.91 | 140.1     | 6.036 | 970882   | 0.27      |
| 31  | Hexanoic acid, 2-phenylethyl ester                                                    | C14H20O2 | 75.69 | 220.1     | 6.15  | 732611   | 0.21      |
| 32  | 2-Nonynoic acid                                                                       | C9H14O2  | 82.56 | 154.1     | 6.402 | 1576539  | 0.44      |
| 33  | 2H-Pyran, 3,4-dihydro-                                                                | C5H8O    | 78.36 | 84.1      | 6.562 | 3710984  | 1.04      |
| 34  | 1,3-Butadiene-1-carboxylic acid                                                       | C5H6O2   | 81.28 | 98        | 6.665 | 1431305  | 0.40      |
| 35  | 6-Oxa-bicyclo[3.1.0]hexan-3-one                                                       | C5H6O2   | 91.58 | 98        | 6.768 | 8937375  | 2.51      |
| 36  | 2,5-Furandione, dihydro-3-methylene-                                                  | C5H4O3   | 78.39 | 112       | 7.053 | 1533264  | 0.43      |
| 37  | 1-Octyn-3-ol                                                                          | C8H14O   | 75.47 | 126.1     | 7.282 | 619188   | 0.17      |
| 38  | 2-Decen-1-ol                                                                          | C10H20O  | 74.74 | 156.2     | 7.408 | 5479039  | 1.54      |

|    |                                                       |            |       |       |        |          |       |
|----|-------------------------------------------------------|------------|-------|-------|--------|----------|-------|
| 39 | 2-Cyclohexen-1-one, 2-methyl-                         | C7H10O     | 76.38 | 110.1 | 7.659  | 2577127  | 0.72  |
| 40 | Carbamic acid, phenyl ester                           | C7H7NO2    | 79.2  | 137   | 7.716  | 748146   | 0.21  |
| 41 | Oxazolidine, 2,2-diethyl-3-methyl-                    | C8H17NO    | 77.84 | 143.1 | 8.025  | 9600193  | 2.70  |
| 42 | 2-Cyclopenten-1-one, 2-hydroxy-3-methyl-              | C6H8O2     | 83.73 | 112.1 | 8.276  | 1605795  | 0.45  |
| 43 | 9-Oxabicyclo[6.1.0]nonan-4-one                        | C8H12O2    | 77.88 | 140.1 | 8.391  | 621223   | 0.17  |
| 44 | 2-Cyclopenten-1-one, 2-hydroxy-3-methyl-              | C6H8O2     | 94.28 | 112.1 | 8.516  | 5167990  | 1.45  |
| 45 | 6,7-Dioxabicyclo[3.2.1]octane, 1-methyl-              | C7H12O2    | 78.42 | 128.1 | 8.733  | 2167130  | 0.61  |
| 46 | 2-Octanone, 1-nitro-                                  | C8H15NO3   | 73.24 | 173.1 | 8.779  | 3462517  | 0.97  |
| 47 | 1,2,6-Hexanetriol                                     | C6H14O3    | 71.52 | 134.1 | 8.951  | 1712921  | 0.48  |
| 48 | 1,2,6-Hexanetriol                                     | C6H14O3    | 73.48 | 134.1 | 9.076  | 915437   | 0.26  |
| 49 | 3-Nonynoic acid                                       | C9H14O2    | 76.93 | 154.1 | 9.259  | 3716694  | 1.05  |
| 50 | cis-2-Ethyl-2-hexen-1-ol                              | C8H16O     | 72.8  | 128.1 | 9.454  | 2582022  | 0.73  |
| 51 | 1-Octyn-3-ol, 4-ethyl-                                | C10H18O    | 80.61 | 154.1 | 9.625  | 2744450  | 0.77  |
| 52 | 3-Nonynoic acid                                       | C9H14O2    | 79.69 | 154.1 | 9.716  | 641780   | 0.18  |
| 53 | 2-Hexenal, 2-ethyl-                                   | C8H14O     | 79.98 | 126.1 | 9.899  | 3257874  | 0.92  |
| 54 | Furan-2-carbohydrazide, N2-(1-methylhexylideno)-      | C12H18N2O2 | 77.44 | 222.1 | 9.991  | 1819653  | 0.51  |
| 55 | 9-Oxabicyclo[6.1.0]nonan-4-one                        | C8H12O2    | 74.49 | 140.1 | 10.048 | 2581440  | 0.73  |
| 56 | Bicyclo[2.2.1]heptan-2-ol, 7,7-dimethyl-, acetate     | C11H18O2   | 75.3  | 182.1 | 10.414 | 499887   | 0.14  |
| 57 | 9-Oxabicyclo[6.1.0]nonan-4-one                        | C8H12O2    | 71.64 | 140.1 | 10.494 | 2270428  | 0.64  |
| 58 | R-Limonene                                            | C10H16O3   | 78.9  | 184.1 | 10.711 | 1390987  | 0.39  |
| 59 | 6-Hydroxyhexahydrocyclopenta[b]furan-2-one            | C7H10O3    | 83.15 | 142.1 | 11.065 | 11111355 | 3.12  |
| 60 | cis-2-Ethyl-2-hexen-1-ol                              | C8H16O     | 78.05 | 128.1 | 11.225 | 2676448  | 0.75  |
| 61 | 4-Cyclopropylcarbonyloxytridecane                     | C17H32O2   | 75.93 | 268.2 | 11.419 | 3273802  | 0.92  |
| 62 | 3-Trifluoroacetoxydodecane                            | C14H25F3O2 | 79.7  | 282.2 | 11.568 | 1413548  | 0.40  |
| 63 | 5-Hydroxymethylfurfural                               | C6H6O3     | 81.7  | 126   | 11.671 | 8963395  | 2.52  |
| 64 | 2-Dodecenoic acid                                     | C12H22O2   | 80.39 | 198.2 | 11.991 | 1438101  | 0.40  |
| 65 | 4H,5H-Pyrano[4,3-d]-1,3-dioxin, tetrahydro-8a-methyl- | C8H14O3    | 79.31 | 158.1 | 12.254 | 7496246  | 2.11  |
| 66 | 3-Decenoic acid                                       | C10H18O2   | 79.64 | 170.1 | 12.357 | 7184763  | 2.02  |
| 67 | R-Limonene                                            | C10H16O3   | 78.62 | 184.1 | 12.597 | 500798   | 0.14  |
| 68 | R-Limonene                                            | C10H16O3   | 80.2  | 184.1 | 12.665 | 662066   | 0.19  |
| 69 | Melezitose                                            | C18H32O16  | 76.54 | 504.2 | 12.768 | 3542444  | 1.00  |
| 70 | 3,5-Heptadienal, 2-ethylidene-6-methyl-               | C10H14O    | 83.47 | 150.1 | 12.86  | 3267673  | 0.92  |
| 71 | R-Limonene                                            | C10H16O3   | 80.87 | 184.1 | 13.077 | 1354880  | 0.38  |
| 72 | R-Limonene                                            | C10H16O3   | 84.7  | 184.1 | 13.397 | 949173   | 0.27  |
| 73 | R-Limonene                                            | C10H16O3   | 83.45 | 184.1 | 13.465 | 492462   | 0.14  |
| 74 | Melezitose                                            | C18H32O16  | 83.98 | 504.2 | 14.014 | 6905044  | 1.94  |
| 75 | R-Limonene                                            | C10H16O3   | 81.21 | 184.1 | 14.414 | 559756   | 0.16  |
| 76 | R-Limonene                                            | C10H16O3   | 83.38 | 184.1 | 14.574 | 677423   | 0.19  |
| 77 | 10-Heptadecen-8-ynoic acid, methyl ester, (E)-        | C18H30O2   | 81.48 | 278.2 | 14.654 | 565674   | 0.16  |
| 78 | R-Limonene                                            | C10H16O3   | 81.2  | 184.1 | 14.86  | 2422261  | 0.68  |
| 79 | R-Limonene                                            | C10H16O3   | 79.62 | 184.1 | 15.191 | 844282   | 0.24  |
| 80 | .beta.-D-Glucopyranose, 1,6-anhydro-                  | C6H10O5    | 90.23 | 162.1 | 15.877 | 47743009 | 13.42 |
| 81 | .beta.-D-Glucopyranose, 1,6-anhydro-                  | C6H10O5    | 91.5  | 162.1 | 16.003 | 29409924 | 8.27  |
| 82 | Melezitose                                            | C18H32O16  | 79.01 | 504.2 | 16.506 | 2607895  | 0.73  |

|    |                                                                                                     |            |       |       |        |         |      |
|----|-----------------------------------------------------------------------------------------------------|------------|-------|-------|--------|---------|------|
| 83 | Dodecanoic acid, 3-hydroxy-                                                                         | C12H24O3   | 79.89 | 216.2 | 16.951 | 3434737 | 0.97 |
| 84 | Acetamide, N-methyl-N-[4-(3-hydroxypyrrolidinyl)-2-butyryl]-                                        | C11H18N2O2 | 80.81 | 210.1 | 17.169 | 492109  | 0.14 |
| 85 | 3H-Cyclodeca[b]furan-2-one, 4,9-dihydroxy-6-methyl-3,10-dimethylene-3a,4,7,8,9,10,11,11a-octahydro- | C15H20O4   | 83.58 | 264.1 | 20.037 | 530979  | 0.15 |
| 86 | n-Hexadecanoic acid                                                                                 | C16H32O2   | 89.08 | 256.2 | 20.243 | 3143476 | 0.88 |
| 87 | Oleic Acid                                                                                          | C18H34O2   | 81.53 | 282.3 | 21.9   | 484547  | 0.14 |
| 88 | Octadecanoic acid                                                                                   | C18H36O2   | 81.89 | 284.3 | 22.118 | 1097852 | 0.31 |
| 89 | 9-Hexadecenoic acid                                                                                 | C16H30O2   | 79.95 | 254.2 | 23.489 | 557084  | 0.16 |
| 90 | Oleic Acid                                                                                          | C18H34O2   | 74.2  | 282.3 | 23.683 | 483251  | 0.14 |
| 91 | 13-Docosenamide, (Z)-                                                                               | C22H43NO   | 77.81 | 337.3 | 27.055 | 2505397 | 0.70 |
